# Supplementary material
Source: PubMed Central journal article supplement (PMC4318626)
Supplement: la5034367_si_001.pdf [file la5034367_si_001.pdf]

# Cellulose, Chitosan and Keratin Composite Materials.

## Controlled Release of Drug

Chieu D. Tran\* and Tamutsiwa M. Mututuvvari

Department of Chemistry, Marquette University, P. O. Box 1881, Milwaukee, WI 53201

### SUPPORTING INFORMATION

#### Chemicals

Chitosan (MW $\approx$ 310-375kDa), derived from chitin from crustacean shells and microcrystalline cellulose (DP $\approx$ 300),<sup>1</sup> derived from cotton linters, were purchased from Sigma-Aldrich (Milwaukee, WI). The degree of deacetylation of chitosan, determined by FT-IR, was found to be 84 $\pm$ 2 %.<sup>1</sup> Raw sheep (untreated) wool, obtained from a local farm, was cleaned by Soxhlet extraction using a 1:1 (v/v) acetone/ethanol mixture at 80 $\pm$ 3 °C for 48 h. The wool was then rinsed with distilled water and dried at 100 $\pm$ 1 °C for 12 h.<sup>2</sup> 1-Methylimidazole and *n*-chlorobutane (both from Alfa Aesar, Ward Hill, MA) were distilled and subsequently used to synthesize [BMIm<sup>+</sup>CL<sup>-</sup>].<sup>1</sup> Ciprofloxacin (Scheme 1) (TCI America) was used as the model drug. Double-distilled deionized water (18 M $\Omega$  cm<sup>-1</sup>) was used to prepare 1.0 mM phosphate buffer (pH 7.2).

#### Instruments.

FTIR spectra (from 450-4,000 cm<sup>-1</sup> were recorded on a Spectrum 100 Series FTIR spectrometer (Perkin Elmer, USA) at resolution of 2 cm<sup>-1</sup> by the KBr method. Each spectrum was an average of 64 individual spectra. Fluorescence spectra were recorded on a spectrofluorometer (QuantaMaster 40, PTI, Birmingham, NJ) at 2 nm interval; 0.4 sec

integration time; 0.50 nm and 0.25 nm entrance and exit slit widths respectively. The tensile strength of the composite films were evaluated on an Instron 5500R tensile tester (Instron Corp., Canton, MA) equipped with a 1.0 kN load cell and operated at a crosshead speed of 5 mm min<sup>-1</sup>. Each specimen had a gauge length and width of 25 mm and 10 mm respectively.

## REFERENCES

- (1) Battista, O. A.; Smith, P. A. Microcrystalline cellulose. *Ind. Eng. Chem.* 1962, 54, 20-29.
- (2) Xie, H.; Li, S.; Zhang, S. Ionic liquids as novel solvents for the dissolution and blending of wool keratin fibers. *Green Chem.* 2005, 7, 606-608.
